# Supplementary material for: Challenges in evaluating treatments for COVID-19: The case of in-hospital anticoagulant use and the risk of adverse outcomes
Source: Front Pharmacol. 2022 Nov 24;13:1034636. doi: 10.3389/fphar.2022.1034636 (PMC9729259; doi:10.3389/fphar.2022.1034636)
Supplement: Supplementary file 3 [file Table1.XLSX]

## Sheet: ARDS
ICD-10 CODE	ICD-10 CODE DESCRIPTION
J80	Acute respiratory distress syndrome

## Sheet: Respiratory failure
ICD-10 CODE	ICD-10 CODE DESCRIPTION
J80	Acute respiratory distress syndrome
J95.821	Acute postprocedural respiratory failure
J95.822	Acute and chronic postprocedural respiratory failure
J96.00	Acute respiratory failure, unspecified whether with hypoxia or hypercapnia
J96.01	Acute respiratory failure with hypoxia
J96.02	Acute respiratory failure with hypercapnia
J96.10	Chronic respiratory failure, unspecified whether with hypoxia or hypercapnia
J96.11	Chronic respiratory failure with hypoxia
J96.12	Chronic respiratory failure with hypercapnia
J96.20	Acute and chronic respiratory failure, unspecified whether with hypoxia or hypercapnia
J96.21	Acute and chronic respiratory failure with hypoxia
J96.22	Acute and chronic respiratory failure with hypercapnia
J96.90	Respiratory failure, unspecified, unspecified whether with hypoxia or hypercapnia
J96.91	Respiratory failure, unspecified with hypoxia
J96.92	Respiratory failure, unspecified with hypercapnia
R09.2	Respiratory arrest

## Sheet: Ventilator use
ICD-10 CODE	ICD-10 CODE DESCRIPTION
Z99.11	Dependence on respirator [ventilator] status
Relevant local procedure codes

## Sheet: MI
ICD-10 CODE	ICD-10 CODE DESCRIPTION
I21	ST elevation (STEMI) and non-ST elevation (NSTEMI) myocardial infarction
I21.0	ST elevation (STEMI) myocardial infarction of anterior wall
I21.01	ST elevation (STEMI) myocardial infarction involving left main coronary artery
I21.02	ST elevation (STEMI) myocardial infarction involving left anterior descending coronary artery
I21.09	ST elevation (STEMI) myocardial infarction involving other coronary artery of anterior wall
I21.1	ST elevation (STEMI) myocardial infarction of inferior wall
I21.11	ST elevation (STEMI) myocardial infarction involving right coronary artery
I21.19	ST elevation (STEMI) myocardial infarction involving other coronary artery of inferior wall
I21.2	ST elevation (STEMI) myocardial infarction of other sites
I21.21	ST elevation (STEMI) myocardial infarction involving left circumflex coronary artery
I21.29	ST elevation (STEMI) myocardial infarction involving other sites
I21.3	ST elevation (STEMI) myocardial infarction of unspecified site
I21.4	Non-ST elevation (NSTEMI) myocardial infarction

## Sheet: Cardiac arrest
ICD-10 CODE	ICD-10 CODE DESCRIPTION
I46	Cardiac arrest
I46.2	Cardiac arrest due to underlying cardiac condition
I46.8	Cardiac arrest due to other underlying condition
I46.9	Cardiac arrest, cause unspecified

## Sheet: HF
ICD-10 CODE	ICD-10 CODE DESCRIPTION
I50	Heart failure
I50.1	Left ventricular failure
I50.2	Systolic (congestive) heart failure
I50.20	Unspecified systolic (congestive) heart failure
I50.21	Acute systolic (congestive) heart failure
I50.22	Chronic systolic (congestive) heart failure
I50.23	Acute on chronic systolic (congestive) heart failure
I50.3	Diastolic (congestive) heart failure
I50.30	Unspecified diastolic (congestive) heart failure
I50.31	Acute diastolic (congestive) heart failure
I50.32	Chronic diastolic (congestive) heart failure
I50.33	Acute on chronic diastolic (congestive) heart failure
I50.4	Combined systolic (congestive) and diastolic (congestive) heart failure
I50.40	Unspecified combined systolic (congestive) and diastolic (congestive) heart failure
I50.41	Acute combined systolic (congestive) and diastolic (congestive) heart failure
I50.42	Chronic combined systolic (congestive) and diastolic (congestive) heart failure
I50.43	Acute on chronic combined systolic (congestive) and diastolic (congestive) heart failure
I50.9	Heart failure, unspecified

## Sheet: Stroke
ICD-10-Code	ICD-10-HEADER
G46.4	Cerebellar stroke syndrome
G46.3	Brain stem stroke syndrome
I60	Nontraumatic subarachnoid hemorrhage
I60.0	Nontraumatic subarachnoid hemorrhage from carotid siphon and bifurcation
I60.00	Nontraumatic subarachnoid hemorrhage from unspecified carotid siphon and bifurcation
I60.01	Nontraumatic subarachnoid hemorrhage from right carotid siphon and bifurcation
I60.02	Nontraumatic subarachnoid hemorrhage from left carotid siphon and bifurcation
I60.1	Nontraumatic subarachnoid hemorrhage from middle cerebral artery
I60.10	Nontraumatic subarachnoid hemorrhage from unspecified middle cerebral artery
I60.11	Nontraumatic subarachnoid hemorrhage from right middle cerebral artery
I60.12	Nontraumatic subarachnoid hemorrhage from left middle cerebral artery
I60.2	Nontraumatic subarachnoid hemorrhage from anterior communicating artery
I60.3	Nontraumatic subarachnoid hemorrhage from posterior communicating artery
I60.30	Nontraumatic subarachnoid hemorrhage from unspecified posterior communicating artery
I60.31	Nontraumatic subarachnoid hemorrhage from right posterior communicating artery
I60.32	Nontraumatic subarachnoid hemorrhage from left posterior communicating artery
I60.4	Nontraumatic subarachnoid hemorrhage from basilar artery
I60.5	Nontraumatic subarachnoid hemorrhage from vertebral artery
I60.50	Nontraumatic subarachnoid hemorrhage from unspecified vertebral artery
I60.51	Nontraumatic subarachnoid hemorrhage from right vertebral artery
I60.52	Nontraumatic subarachnoid hemorrhage from left vertebral artery
I60.6	Nontraumatic subarachnoid hemorrhage from other intracranial arteries
I60.7	Nontraumatic subarachnoid hemorrhage from unspecified intracranial artery
I60.8	Other nontraumatic subarachnoid hemorrhage
I60.9	Nontraumatic subarachnoid hemorrhage, unspecified
I61	Nontraumatic intracerebral hemorrhage
I61.0	Nontraumatic intracerebral hemorrhage in hemisphere, subcortical
I61.1	Nontraumatic intracerebral hemorrhage in hemisphere, cortical
I61.2	Nontraumatic intracerebral hemorrhage in hemisphere, unspecified
I61.3	Nontraumatic intracerebral hemorrhage in brain stem
I61.4	Nontraumatic intracerebral hemorrhage in cerebellum
I61.5	Nontraumatic intracerebral hemorrhage, intraventricular
I61.6	Nontraumatic intracerebral hemorrhage, multiple localized
I61.8	Other nontraumatic intracerebral hemorrhage
I61.9	Nontraumatic intracerebral hemorrhage, unspecified
I62	Other and unspecified nontraumatic intracranial hemorrhage
I62.0	Nontraumatic subdural hemorrhage
I62.00	…… unspecified
I62.01	Nontraumatic acute subdural hemorrhage
I62.02	Nontraumatic subacute subdural hemorrhage
I62.03	Nontraumatic chronic subdural hemorrhage
I62.1	Nontraumatic extradural hemorrhage
I62.9	Nontraumatic intracranial hemorrhage, unspecified
I63	Cerebral infarction
I63.0	Cerebral infarction due to thrombosis of precerebral arteries
I63.00	Cerebral infarction due to thrombosis of unspecified precerebral artery
I63.01	Cerebral infarction due to thrombosis of vertebral artery
I63.011	Cerebral infarction due to thrombosis of right vertebral artery
I63.012	Cerebral infarction due to thrombosis of left vertebral artery
I63.013	Cerebral infarction due to thrombosis of bilateral vertebral arteries
I63.019	Cerebral infarction due to thrombosis of unspecified vertebral artery
I63.02	Cerebral infarction due to thrombosis of basilar artery
I63.03	Cerebral infarction due to thrombosis of carotid artery
I63.031	Cerebral infarction due to thrombosis of right carotid artery
I63.032	Cerebral infarction due to thrombosis of left carotid artery
I63.033	Cerebral infarction due to thrombosis of bilateral carotid arteries
I63.039	Cerebral infarction due to thrombosis of unspecified carotid artery
I63.09	Cerebral infarction due to thrombosis of other precerebral artery
I63.1	Cerebral infarction due to embolism of precerebral arteries
I63.10	Cerebral infarction due to embolism of unspecified precerebral artery
I63.11	Cerebral infarction due to embolism of vertebral artery
I63.111	Cerebral infarction due to embolism of right vertebral artery
I63.112	Cerebral infarction due to embolism of left vertebral artery
I63.113	Cerebral infarction due to embolism of bilateral vertebral arteries
I63.119	Cerebral infarction due to embolism of unspecified vertebral artery
I63.12	Cerebral infarction due to embolism of basilar artery
I63.13	Cerebral infarction due to embolism of carotid artery
I63.131	Cerebral infarction due to embolism of right carotid artery
I63.132	Cerebral infarction due to embolism of left carotid artery
I63.133	Cerebral infarction due to embolism of bilateral carotid arteries
I63.139	Cerebral infarction due to embolism of unspecified carotid artery
I63.19	Cerebral infarction due to embolism of other precerebral artery
I63.2	Cerebral infarction due to unspecified occlusion or stenosis of precerebral arteries
I63.20	Cerebral infarction due to unspecified occlusion or stenosis of unspecified precerebral arteries
I63.21	Cerebral infarction due to unspecified occlusion or stenosis of vertebral arteries
I63.211	Cerebral infarction due to unspecified occlusion or stenosis of right vertebral arteries
I63.212	Cerebral infarction due to unspecified occlusion or stenosis of left vertebral arteries
I63.213	Cerebral infarction due to unspecified occlusion or stenosis of bilateral vertebral arteries
I63.219	Cerebral infarction due to unspecified occlusion or stenosis of unspecified vertebral arteries
I63.22	Cerebral infarction due to unspecified occlusion or stenosis of basilar arteries
I63.23	Cerebral infarction due to unspecified occlusion or stenosis of carotid arteries
I63.231	Cerebral infarction due to unspecified occlusion or stenosis of right carotid arteries
I63.232	Cerebral infarction due to unspecified occlusion or stenosis of left carotid arteries
I63.233	Cerebral infarction due to unspecified occlusion or stenosis of bilateral carotid arteries
I63.239	Cerebral infarction due to unspecified occlusion or stenosis of unspecified carotid arteries
I63.29	Cerebral infarction due to unspecified occlusion or stenosis of other precerebral arteries
I63.3	Cerebral infarction due to thrombosis of cerebral arteries
I63.30	Cerebral infarction due to thrombosis of unspecified cerebral artery
I63.31	Cerebral infarction due to thrombosis of middle cerebral artery
I63.311	Cerebral infarction due to thrombosis of right middle cerebral artery
I63.312	Cerebral infarction due to thrombosis of left middle cerebral artery
I63.313	Cerebral infarction due to thrombosis of bilateral middle cerebral arteries
I63.319	Cerebral infarction due to thrombosis of unspecified middle cerebral artery
I63.32	Cerebral infarction due to thrombosis of anterior cerebral artery
I63.321	Cerebral infarction due to thrombosis of right anterior cerebral artery
I63.322	Cerebral infarction due to thrombosis of left anterior cerebral artery
I63.323	Cerebral infarction due to thrombosis of bilateral anterior arteries
I63.329	Cerebral infarction due to thrombosis of unspecified anterior cerebral artery
I63.33	Cerebral infarction due to thrombosis of posterior cerebral artery
I63.331	Cerebral infarction due to thrombosis of right posterior cerebral artery
I63.332	Cerebral infarction due to thrombosis of left posterior cerebral artery
I63.333	Cerebral infarction to thrombosis of bilateral posterior arteries
I63.339	Cerebral infarction due to thrombosis of unspecified posterior cerebral artery
I63.34	Cerebral infarction due to thrombosis of cerebellar artery
I63.341	Cerebral infarction due to thrombosis of right cerebellar artery
I63.342	Cerebral infarction due to thrombosis of left cerebellar artery
I63.343	Cerebral infarction to thrombosis of bilateral cerebellar arteries
I63.349	Cerebral infarction due to thrombosis of unspecified cerebellar artery
I63.39	Cerebral infarction due to thrombosis of other cerebral artery
I63.4	Cerebral infarction due to embolism of cerebral arteries
I63.40	Cerebral infarction due to embolism of unspecified cerebral artery
I63.41	Cerebral infarction due to embolism of middle cerebral artery
I63.411	Cerebral infarction due to embolism of right middle cerebral artery
I63.412	Cerebral infarction due to embolism of left middle cerebral artery
I63.413	Cerebral infarction due to embolism of bilateral middle cerebral arteries
I63.419	Cerebral infarction due to embolism of unspecified middle cerebral artery
I63.42	Cerebral infarction due to embolism of anterior cerebral artery
I63.421	Cerebral infarction due to embolism of right anterior cerebral artery
I63.422	Cerebral infarction due to embolism of left anterior cerebral artery
I63.423	Cerebral infarction due to embolism of bilateral anterior cerebral arteries
I63.429	Cerebral infarction due to embolism of unspecified anterior cerebral artery
I63.43	Cerebral infarction due to embolism of posterior cerebral artery
I63.431	Cerebral infarction due to embolism of right posterior cerebral artery
I63.432	Cerebral infarction due to embolism of left posterior cerebral artery
I63.433	Cerebral infarction due to embolism of bilateral posterior cerebral arteries
I63.439	Cerebral infarction due to embolism of unspecified posterior cerebral artery
I63.44	Cerebral infarction due to embolism of cerebellar artery
I63.441	Cerebral infarction due to embolism of right cerebellar artery
I63.442	Cerebral infarction due to embolism of left cerebellar artery
I63.443	Cerebral infarction due to embolism of bilateral cerebellar arteries
I63.449	Cerebral infarction due to embolism of unspecified cerebellar artery
I63.49	Cerebral infarction due to embolism of other cerebral artery
I63.5	Cerebral infarction due to unspecified occlusion or stenosis of cerebral arteries
I63.50	Cerebral infarction due to unspecified occlusion or stenosis of unspecified cerebral artery
I63.51	Cerebral infarction due to unspecified occlusion or stenosis of middle cerebral artery
I63.511	Cerebral infarction due to unspecified occlusion or stenosis of right middle cerebral artery
I63.512	Cerebral infarction due to unspecified occlusion or stenosis of left middle cerebral artery
I63.513	Cerebral infarction due to unspecified occlusion or stenosis of bilateral middle arteries
I63.519	Cerebral infarction due to unspecified occlusion or stenosis of unspecified middle cerebral artery
I63.52	Cerebral infarction due to unspecified occlusion or stenosis of anterior cerebral artery
I63.521	Cerebral infarction due to unspecified occlusion or stenosis of right anterior cerebral artery
I63.522	Cerebral infarction due to unspecified occlusion or stenosis of left anterior cerebral artery
I63.523	Cerebral infarction due to unspecified occlusion or stenosis of bilateral anterior arteries
I63.529	Cerebral infarction due to unspecified occlusion or stenosis of unspecified anterior cerebral artery
I63.53	Cerebral infarction due to unspecified occlusion or stenosis of posterior cerebral artery
I63.531	Cerebral infarction due to unspecified occlusion or stenosis of right posterior cerebral artery
I63.532	Cerebral infarction due to unspecified occlusion or stenosis of left posterior cerebral artery
I63.533	Cerebral infarction due to unspecified occlusion or stenosis of bilateral posterior arteries
I63.539	Cerebral infarction due to unspecified occlusion or stenosis of unspecified posterior cerebral artery
I63.54	Cerebral infarction due to unspecified occlusion or stenosis of cerebellar artery
I63.541	Cerebral infarction due to unspecified occlusion or stenosis of right cerebellar artery
I63.542	Cerebral infarction due to unspecified occlusion or stenosis of left cerebellar artery
I63.543	Cerebral infarction due to unspecified occlusion or stenosis of bilateral cerebellar arteries
I63.549	Cerebral infarction due to unspecified occlusion or stenosis of unspecified cerebellar artery
I63.59	Cerebral infarction due to unspecified occlusion or stenosis of other cerebral artery
I63.6	Cerebral infarction due to cerebral venous thrombosis, nonpyogenic
I63.8	Other cerebral infarction
I63.9	Cerebral infarction, unspecified
I64	Stroke, not specified as haemorrhage or infarction

## Sheet: VTE
Subgroup	ICD-10-Code	ICD-10-HEADER
Deep vein thrombosis (DVT)	G08	Intracranial and intraspinal phlebitis and thrombophlebitis
Pulmonary embolism (PE)	I26.01	Septic pulmonary embolism with acute cor pulmonale
Pulmonary embolism (PE)	I26.02	Saddle embolus of pulmonary artery with acute cor pulmonale
Pulmonary embolism (PE)	I26.09	Other pulmonary embolism with acute cor pulmonale
Pulmonary embolism (PE)	I26.90	Septic pulmonary embolism without acute cor pulmonale
Pulmonary embolism (PE)	I26.92	Saddle embolus of pulmonary artery without acute cor pulmonale
Pulmonary embolism (PE)	I26.99	Other pulmonary embolism without acute cor pulmonale
Deep vein thrombosis (DVT)	I67.6	Nonpyogenic thrombosis of intracranial venous system
Deep vein thrombosis (DVT)	I80.10	Phlebitis and thrombophlebitis of unspecified femoral vein
Deep vein thrombosis (DVT)	I80.11	Phlebitis and thrombophlebitis of right femoral vein
Deep vein thrombosis (DVT)	I80.12	Phlebitis and thrombophlebitis of left femoral vein
Deep vein thrombosis (DVT)	I80.13	Phlebitis and thrombophlebitis of femoral vein, bilateral
Deep vein thrombosis (DVT)	I80.201	Phlebitis and thrombophlebitis of unspecified deep vessels of right lower extremity
Deep vein thrombosis (DVT)	I80.202	Phlebitis and thrombophlebitis of unspecified deep vessels of left lower extremity
Deep vein thrombosis (DVT)	I80.203	Phlebitis and thrombophlebitis of unspecified deep vessels of lower extremities, bilateral
Deep vein thrombosis (DVT)	I80.209	Phlebitis and thrombophlebitis of unspecified deep vessels of unspecified lower extremity
Deep vein thrombosis (DVT)	I80.211	Phlebitis and thrombophlebitis of right iliac vein
Deep vein thrombosis (DVT)	I80.212	Phlebitis and thrombophlebitis of left iliac vein
Deep vein thrombosis (DVT)	I80.213	Phlebitis and thrombophlebitis of iliac vein, bilateral
Deep vein thrombosis (DVT)	I80.219	Phlebitis and thrombophlebitis of unspecified iliac vein
Deep vein thrombosis (DVT)	I80.221	Phlebitis and thrombophlebitis of right popliteal vein
Deep vein thrombosis (DVT)	I80.222	Phlebitis and thrombophlebitis of left popliteal vein
Deep vein thrombosis (DVT)	I80.223	Phlebitis and thrombophlebitis of popliteal vein, bilateral
Deep vein thrombosis (DVT)	I80.229	Phlebitis and thrombophlebitis of unspecified popliteal vein
Deep vein thrombosis (DVT)	I80.231	Phlebitis and thrombophlebitis of right tibial vein
Deep vein thrombosis (DVT)	I80.232	Phlebitis and thrombophlebitis of left tibial vein
Deep vein thrombosis (DVT)	I80.233	Phlebitis and thrombophlebitis of tibial vein, bilateral
Deep vein thrombosis (DVT)	I80.239	Phlebitis and thrombophlebitis of unspecified tibial vein
Deep vein thrombosis (DVT)	I80.291	Phlebitis and thrombophlebitis of other deep vessels of right lower extremity
Deep vein thrombosis (DVT)	I80.292	Phlebitis and thrombophlebitis of other deep vessels of left lower extremity
Deep vein thrombosis (DVT)	I80.293	Phlebitis and thrombophlebitis of other deep vessels of lower extremity, bilateral
Deep vein thrombosis (DVT)	I80.299	Phlebitis and thrombophlebitis of other deep vessels of unspecified lower extremity
Deep vein thrombosis (DVT)	I81	Portal vein thrombosis
Deep vein thrombosis (DVT)	I82.210	Acute embolism and thrombosis of superior vena cava
Deep vein thrombosis (DVT)	I82.211	Chronic embolism and thrombosis of superior vena cava
Deep vein thrombosis (DVT)	I82.220	Acute embolism and thrombosis of inferior vena cava
Deep vein thrombosis (DVT)	I82.221	Chronic embolism and thrombosis of inferior vena cava
Deep vein thrombosis (DVT)	I82.290	Acute embolism and thrombosis of other thoracic veins
Deep vein thrombosis (DVT)	I82.291	Chronic embolism and thrombosis of other thoracic veins
Deep vein thrombosis (DVT)	I82.3	Embolism and thrombosis of renal vein
Deep vein thrombosis (DVT)	I82.401	Acute embolism and thrombosis of unspecified deep veins of right lower extremity
Deep vein thrombosis (DVT)	I82.402	Acute embolism and thrombosis of unspecified deep veins of left lower extremity
Deep vein thrombosis (DVT)	I82.403	Acute embolism and thrombosis of unspecified deep veins of lower extremity, bilateral
Deep vein thrombosis (DVT)	I82.409	Acute embolism and thrombosis of unspecified deep veins of unspecified lower extremity
Deep vein thrombosis (DVT)	I82.411	Acute embolism and thrombosis of right femoral vein
Deep vein thrombosis (DVT)	I82.412	Acute embolism and thrombosis of left femoral vein
Deep vein thrombosis (DVT)	I82.413	Acute embolism and thrombosis of femoral vein, bilateral
Deep vein thrombosis (DVT)	I82.419	Acute embolism and thrombosis of unspecified femoral vein
Deep vein thrombosis (DVT)	I82.421	Acute embolism and thrombosis of right iliac vein
Deep vein thrombosis (DVT)	I82.422	Acute embolism and thrombosis of left iliac vein
Deep vein thrombosis (DVT)	I82.423	Acute embolism and thrombosis of iliac vein, bilateral
Deep vein thrombosis (DVT)	I82.429	Acute embolism and thrombosis of unspecified iliac vein
Deep vein thrombosis (DVT)	I82.431	Acute embolism and thrombosis of right popliteal vein
Deep vein thrombosis (DVT)	I82.432	Acute embolism and thrombosis of left popliteal vein
Deep vein thrombosis (DVT)	I82.433	Acute embolism and thrombosis of popliteal vein, bilateral
Deep vein thrombosis (DVT)	I82.439	Acute embolism and thrombosis of unspecified popliteal vein
Deep vein thrombosis (DVT)	I82.441	Acute embolism and thrombosis of right tibial vein
Deep vein thrombosis (DVT)	I82.442	Acute embolism and thrombosis of left tibial vein
Deep vein thrombosis (DVT)	I82.443	Acute embolism and thrombosis of tibial vein, bilateral
Deep vein thrombosis (DVT)	I82.449	Acute embolism and thrombosis of unspecified tibial vein
Deep vein thrombosis (DVT)	I82.491	Acute embolism and thrombosis of other specified deep vein of right lower extremity
Deep vein thrombosis (DVT)	I82.492	Acute embolism and thrombosis of other specified deep vein of left lower extremity
Deep vein thrombosis (DVT)	I82.493	Acute embolism and thrombosis of other specified deep vein of lower extremity, bilateral
Deep vein thrombosis (DVT)	I82.499	Acute embolism and thrombosis of other specified deep vein of unspecified lower extremity
Deep vein thrombosis (DVT)	I82.4Y1	Acute embolism and thrombosis of unspecified deep veins of right proximal lower extremity
Deep vein thrombosis (DVT)	I82.4Y2	Acute embolism and thrombosis of unspecified deep veins of left proximal lower extremity
Deep vein thrombosis (DVT)	I82.4Y3	Acute embolism and thrombosis of unspecified deep veins of proximal lower extremity, bilateral
Deep vein thrombosis (DVT)	I82.4Y9	Acute embolism and thrombosis of unspecified deep veins of unspecified proximal lower extremity
Deep vein thrombosis (DVT)	I82.4Z1	Acute embolism and thrombosis of unspecified deep veins of right distal lower extremity
Deep vein thrombosis (DVT)	I82.4Z2	Acute embolism and thrombosis of unspecified deep veins of left distal lower extremity
Deep vein thrombosis (DVT)	I82.4Z3	Acute embolism and thrombosis of unspecified deep veins of distal lower extremity, bilateral
Deep vein thrombosis (DVT)	I82.4Z9	Acute embolism and thrombosis of unspecified deep veins of unspecified distal lower extremity
Deep vein thrombosis (DVT)	I82.501	Chronic embolism and thrombosis of unspecified deep veins of right lower extremity
Deep vein thrombosis (DVT)	I82.502	Chronic embolism and thrombosis of unspecified deep veins of left lower extremity
Deep vein thrombosis (DVT)	I82.503	Chronic embolism and thrombosis of unspecified deep veins of lower extremity, bilateral
Deep vein thrombosis (DVT)	I82.509	Chronic embolism and thrombosis of unspecified deep veins of unspecified lower extremity
Deep vein thrombosis (DVT)	I82.511	Chronic embolism and thrombosis of right femoral vein
Deep vein thrombosis (DVT)	I82.512	Chronic embolism and thrombosis of left femoral vein
Deep vein thrombosis (DVT)	I82.513	Chronic embolism and thrombosis of femoral vein, bilateral
Deep vein thrombosis (DVT)	I82.519	Chronic embolism and thrombosis of unspecified femoral vein
Deep vein thrombosis (DVT)	I82.521	Chronic embolism and thrombosis of right iliac vein
Deep vein thrombosis (DVT)	I82.522	Chronic embolism and thrombosis of left iliac vein
Deep vein thrombosis (DVT)	I82.523	Chronic embolism and thrombosis of iliac vein, bilateral
Deep vein thrombosis (DVT)	I82.529	Chronic embolism and thrombosis of unspecified iliac vein
Deep vein thrombosis (DVT)	I82.531	Chronic embolism and thrombosis of right popliteal vein
Deep vein thrombosis (DVT)	I82.532	Chronic embolism and thrombosis of left popliteal vein
Deep vein thrombosis (DVT)	I82.533	Chronic embolism and thrombosis of popliteal vein, bilateral
Deep vein thrombosis (DVT)	I82.539	Chronic embolism and thrombosis of unspecified popliteal vein
Deep vein thrombosis (DVT)	I82.541	Chronic embolism and thrombosis of right tibial vein
Deep vein thrombosis (DVT)	I82.542	Chronic embolism and thrombosis of left tibial vein
Deep vein thrombosis (DVT)	I82.543	Chronic embolism and thrombosis of tibial vein, bilateral
Deep vein thrombosis (DVT)	I82.549	Chronic embolism and thrombosis of unspecified tibial vein
Deep vein thrombosis (DVT)	I82.591	Chronic embolism and thrombosis of other specified deep vein of right lower extremity
Deep vein thrombosis (DVT)	I82.592	Chronic embolism and thrombosis of other specified deep vein of left lower extremity
Deep vein thrombosis (DVT)	I82.593	Chronic embolism and thrombosis of other specified deep vein of lower extremity, bilateral
Deep vein thrombosis (DVT)	I82.599	Chronic embolism and thrombosis of other specified deep vein of unspecified lower extremity
Deep vein thrombosis (DVT)	I82.5Y1	Chronic embolism and thrombosis of unspecified deep veins of right proximal lower extremity
Deep vein thrombosis (DVT)	I82.5Y2	Chronic embolism and thrombosis of unspecified deep veins of left proximal lower extremity
Deep vein thrombosis (DVT)	I82.5Y3	Chronic embolism and thrombosis of unspecified deep veins of proximal lower extremity, bilateral
Deep vein thrombosis (DVT)	I82.5Y9	Chronic embolism and thrombosis of unspecified deep veins of unspecified proximal lower extremity
Deep vein thrombosis (DVT)	I82.5Z1	Chronic embolism and thrombosis of unspecified deep veins of right distal lower extremity
Deep vein thrombosis (DVT)	I82.5Z2	Chronic embolism and thrombosis of unspecified deep veins of left distal lower extremity
Deep vein thrombosis (DVT)	I82.5Z3	Chronic embolism and thrombosis of unspecified deep veins of distal lower extremity, bilateral
Deep vein thrombosis (DVT)	I82.5Z9	Chronic embolism and thrombosis of unspecified deep veins of unspecified distal lower extremity
Deep vein thrombosis (DVT)	I82.601	Acute embolism and thrombosis of unspecified veins of right upper extremity
Deep vein thrombosis (DVT)	I82.602	Acute embolism and thrombosis of unspecified veins of left upper extremity
Deep vein thrombosis (DVT)	I82.603	Acute embolism and thrombosis of unspecified veins of upper extremity, bilateral
Deep vein thrombosis (DVT)	I82.609	Acute embolism and thrombosis of unspecified veins of unspecified upper extremity
Deep vein thrombosis (DVT)	I82.621	Acute embolism and thrombosis of deep veins of right upper extremity
Deep vein thrombosis (DVT)	I82.622	Acute embolism and thrombosis of deep veins of left upper extremity
Deep vein thrombosis (DVT)	I82.623	Acute embolism and thrombosis of deep veins of upper extremity, bilateral
Deep vein thrombosis (DVT)	I82.629	Acute embolism and thrombosis of deep veins of unspecified upper extremity
Deep vein thrombosis (DVT)	I82.701	Chronic embolism and thrombosis of unspecified veins of right upper extremity
Deep vein thrombosis (DVT)	I82.702	Chronic embolism and thrombosis of unspecified veins of left upper extremity
Deep vein thrombosis (DVT)	I82.703	Chronic embolism and thrombosis of unspecified veins of upper extremity, bilateral
Deep vein thrombosis (DVT)	I82.709	Chronic embolism and thrombosis of unspecified veins of unspecified upper extremity
Deep vein thrombosis (DVT)	I82.721	Chronic embolism and thrombosis of deep veins of right upper extremity
Deep vein thrombosis (DVT)	I82.722	Chronic embolism and thrombosis of deep veins of left upper extremity
Deep vein thrombosis (DVT)	I82.723	Chronic embolism and thrombosis of deep veins of upper extremity, bilateral
Deep vein thrombosis (DVT)	I82.729	Chronic embolism and thrombosis of deep veins of unspecified upper extremity
Deep vein thrombosis (DVT)	I82.890	Acute embolism and thrombosis of other specified veins
Deep vein thrombosis (DVT)	I82.891	Chronic embolism and thrombosis of other specified veins
Deep vein thrombosis (DVT)	I82.90	Acute embolism and thrombosis of unspecified vein
Deep vein thrombosis (DVT)	I82.91	Chronic embolism and thrombosis of unspecified vein
Deep vein thrombosis (DVT)	I82.A11	Acute embolism and thrombosis of right axillary vein
Deep vein thrombosis (DVT)	I82.A12	Acute embolism and thrombosis of left axillary vein
Deep vein thrombosis (DVT)	I82.A13	Acute embolism and thrombosis of axillary vein, bilateral
Deep vein thrombosis (DVT)	I82.A19	Acute embolism and thrombosis of unspecified axillary vein
Deep vein thrombosis (DVT)	I82.A21	Chronic embolism and thrombosis of right axillary vein
Deep vein thrombosis (DVT)	I82.A22	Chronic embolism and thrombosis of left axillary vein
Deep vein thrombosis (DVT)	I82.A23	Chronic embolism and thrombosis of axillary vein, bilateral
Deep vein thrombosis (DVT)	I82.A29	Chronic embolism and thrombosis of unspecified axillary vein
Deep vein thrombosis (DVT)	I82.B11	Acute embolism and thrombosis of right subclavian vein
Deep vein thrombosis (DVT)	I82.B12	Acute embolism and thrombosis of left subclavian vein
Deep vein thrombosis (DVT)	I82.B13	Acute embolism and thrombosis of subclavian vein, bilateral
Deep vein thrombosis (DVT)	I82.B19	Acute embolism and thrombosis of unspecified subclavian vein
Deep vein thrombosis (DVT)	I82.B21	Chronic embolism and thrombosis of right subclavian vein
Deep vein thrombosis (DVT)	I82.B22	Chronic embolism and thrombosis of left subclavian vein
Deep vein thrombosis (DVT)	I82.B23	Chronic embolism and thrombosis of subclavian vein, bilateral
Deep vein thrombosis (DVT)	I82.B29	Chronic embolism and thrombosis of unspecified subclavian vein
Deep vein thrombosis (DVT)	I82.C11	Acute embolism and thrombosis of right internal jugular vein
Deep vein thrombosis (DVT)	I82.C12	Acute embolism and thrombosis of left internal jugular vein
Deep vein thrombosis (DVT)	I82.C13	Acute embolism and thrombosis of internal jugular vein, bilateral
Deep vein thrombosis (DVT)	I82.C19	Acute embolism and thrombosis of unspecified internal jugular vein
Deep vein thrombosis (DVT)	I82.C21	Chronic embolism and thrombosis of right internal jugular vein
Deep vein thrombosis (DVT)	I82.C22	Chronic embolism and thrombosis of left internal jugular vein
Deep vein thrombosis (DVT)	I82.C23	Chronic embolism and thrombosis of internal jugular vein, bilateral
Deep vein thrombosis (DVT)	I82.C29	Chronic embolism and thrombosis of unspecified internal jugular vein

## Sheet: Bleeding
subgroup	ICD-10-Code	ICD-10-HEADER
Intracranial hemorrhage (ICH)	I60	Subarachnoid
Intracranial hemorrhage (ICH)	I61	Intracerebral
Intracranial hemorrhage (ICH)	I620	Subdural
Intracranial hemorrhage (ICH)	I621	Nontraumatic extradural (acute)
Intracranial hemorrhage (ICH)	I629	Unspecified intracranial hemorrhage (nontraumatic)
Intracranial hemorrhage (ICH)	I690	Sequelae of subarachnoid hemorrhage
Intracranial hemorrhage (ICH)	I691	Sequelae of intracerebral hemorrhage
Intracranial hemorrhage (ICH)	I692	Sequelae of intracranial hemorrhage
Intracranial hemorrhage (ICH)	S0636	Traumatic hemorrhage of cerebrum
Intracranial hemorrhage (ICH)	S064	Epidural hemorrhage
Intracranial hemorrhage (ICH)	S065	Subdural (traumatic)
Intracranial hemorrhage (ICH)	S066	Subarachnoid (traumatic)
Gastrointestinal bleeding (GIB)	I850	Esophageal varices with bleeding
Gastrointestinal bleeding (GIB)	K920	Hematemesis
Gastrointestinal bleeding (GIB)	K921	Melena
Gastrointestinal bleeding (GIB)	K922	Gastrointestinal hemorrhage (unspecified)
Gastrointestinal bleeding (GIB)	K226	Gastro-esophageal laceration-hemorrhage syndrome
Gastrointestinal bleeding (GIB)	K228	Hemorrhage of esophagus NOS
Gastrointestinal bleeding (GIB)	K250	Acute gastric ulcer with hemorrhage
Gastrointestinal bleeding (GIB)	K252	Acute gastric ulcer with hemorrhage/perforation
Gastrointestinal bleeding (GIB)	K254	Chronic gastric ulcer with hemorrhage
Gastrointestinal bleeding (GIB)	K256	Chronic gastric ulcer with hemorrhage/perforation
Gastrointestinal bleeding (GIB)	K260	Acute duodenal ulcer with hemorrhage
Gastrointestinal bleeding (GIB)	K262	Acute duodenal ulcer with hemorrhage/perforation
Gastrointestinal bleeding (GIB)	K264	Chronic duodenal ulcer with hemorrhage
Gastrointestinal bleeding (GIB)	K266	Chronic duodenal ulcer with hemorrhage/perforation
Gastrointestinal bleeding (GIB)	K270	Acute peptic ulcer with hemorrhage
Gastrointestinal bleeding (GIB)	K272	Acute peptic ulcer with hemorrhage/perforation
Gastrointestinal bleeding (GIB)	K274	Chronic peptic ulcer with hemorrhage
Gastrointestinal bleeding (GIB)	K276	Chronic peptic ulcer with hemorrhage/perforation
Gastrointestinal bleeding (GIB)	K280	Acute gastrojejunal ulcer with hemorrhage
Gastrointestinal bleeding (GIB)	K282	Acute gastrojejunal ulcer with hemorrhage/perforation
Gastrointestinal bleeding (GIB)	K284	Chronic gastrojejunal ulcer with hemorrhage
Gastrointestinal bleeding (GIB)	K286	Chronic gastrojejunal ulcer with hemorrhage/perforation
Gastrointestinal bleeding (GIB)	K290	Acute hemorrhagic gastritis
Gastrointestinal bleeding (GIB)	K2921	Alcoholic gastritis (with hemorrhage)
Gastrointestinal bleeding (GIB)	K2961	Other gastritis with bleeding
Gastrointestinal bleeding (GIB)	K2971	Gastritis (unspecified with bleeding)
Gastrointestinal bleeding (GIB)	K2991	Gastroduodenitis (unspecified with bleeding)
Gastrointestinal bleeding (GIB)	K2981	Duodenitis (with hemorrhage)
Gastrointestinal bleeding (GIB)	K3181	Angiodysplasia of stomach and duodenum with hemorrhage
Gastrointestinal bleeding (GIB)	K5521	Angiodysplasia of colon with hemorrhage
Gastrointestinal bleeding (GIB)	K5711	Diverticulosis of small intestine without perforation or abscess with bleeding
Gastrointestinal bleeding (GIB)	K5713	Diverticulitis of small intestine without perforation or abscess with bleeding
Gastrointestinal bleeding (GIB)	K5731	Diverticulosis of large intestine without perforation or abscess with bleeding
Gastrointestinal bleeding (GIB)	K5733	Diverticulitis of large intestine without perforation or abscess with bleeding
Gastrointestinal bleeding (GIB)	K625	Hemorrhage of anus and rectum
Gastrointestinal bleeding (GIB)	K661	Hemoperitoneum
Other major bleeding	D683	Hemorrhagic disorder due to circulating anticoagulants
Other major bleeding	D699	Unspecified hemorrhagic conditions
Other major bleeding	H0523	Orbital hemorrhage
Other major bleeding	H113	Conjunctival hemorrhage
Other major bleeding	H313	Choroidal hemorrhage and rupture
Other major bleeding	H356	Retinal hemorrhage
Other major bleeding	H431	Vitreous hemorrhage
Other major bleeding	H44819	Hemophthalmos, unspecified eye
Other major bleeding	H450	Vitreous hemorrhage in diseases classified elsewhere
Other major bleeding	H922	Otorrhagia
Other major bleeding	I230	Hemopericardium as current complication following acute myocardial infarction
Other major bleeding	I312	Hemopericardium NEC
Other major bleeding	J942	Hemothorax
Other major bleeding	M250	Hemarthrosis
Other major bleeding	M7981	Nontraumatic hematoma of soft tissue
Other major bleeding	N02	Recurrent and persistent hematuria
Other major bleeding	N421	Congestion and hemorrhage of prostate
Other major bleeding	N836	Hematosalpinx
Other major bleeding	N837	Hematoma of broad ligament
Other major bleeding	N857	Hematometra
Other major bleeding	N897	Hematocolpos
Other major bleeding	N92	Excessive, frequent and irregular menstruation
Other major bleeding	N93	Other abnormal uterine and vaginal bleeding
Other major bleeding	N950	Postmenopausal bleeding
Other major bleeding	R04	Hemorrhage from respiratory passages
Other major bleeding	R31	Unspecified hematuria
Other major bleeding	R233	Spontaneous ecchymoses
Other major bleeding	R58	Hemorrhage NEC
Other major bleeding	T810	Hemorrhage and hematoma complicating a procedure NEC
Other major bleeding	T792	Traumatic secondary and recurrent hemorrhage and seroma, initial encounter
